# Supplementary material for: Metal organic frameworks CAU-1 as new photocatalyst for photochemical vapour generation for analytical atomic spectrometry
Source: Royal Society of Chemistry journal article supplement (doi:10.1039/c4ja00360h), 2014-11-19
Supplement: c4ja00360h1.pdf [file c4ja00360h1.pdf]

## Electronic Supplementary Information (ESI)

# Metal Organic Frameworks CAU-1 as New Photocatalyst for Photochemical Vapor Generation for Analytical Atomic Spectrometry

JiaJia, ZhouLong, Chengbin Zheng, Xi Wu and Xiandeng Hou\*

### 1. Chemicals

All the chemicals are AR grade. Ultrapure water (18.25 M $\Omega$ ·cm) was produced with a purification water system (PCWJ-10, Pure Technology Co. Ltd, Chengdu, China). Tetrabutyl titanate, aluminum chloride hexahydrate, zinc chloride, ferric chloride hexahydrate, terephthalic acid (BDC) and 2-amino terephthalic acid (BDC-NH<sub>2</sub>) were purchased from Aladdin Reagents Co.Ltd.(Shanghai, China). N, N-Dimethylformamide (DMF), formic acid and ethanol were obtained from Kelong Chemical Reagent Co. Ltd. (Chengdu, China); standard aqueous Se(VI) was obtained from National Institute of Metrology China (Beijing, China). All chemicals and standards were kept at 4 °C in the dark until use.

### 2. Instrumentation

The microwave reactor (Master) was purchased from Sineo Microwave Chemistry Technology Co. Ltd. (Shanghai, China). The powder X-ray diffraction (PXRD) patterns were obtained with a X'Pert Pro MPD (Philips, Netherlands) using Cu<sub>K $\alpha$</sub>  radiation. The GC/MS data were obtained with a GCMS-QP2010 plus (Shimadzu, Japan). The atomic fluorescence data were obtained with an AFS-2202 (Beijing Haiguang Instrument Co., Beijing, China). The optimal parameters for the PCVG-AFS system were summarized in Table S1.

Table. S1 The optimum parameters of AFS

| AFS parameters        |            |
|-----------------------|------------|
| PMT voltage           | -310 V     |
| HCL current           | 80 mA      |
| Auxiliary current     | 40 mA      |
| Excitation wavelength | 196.0 nm   |
| Argon flow rate       | 400 mL/min |
| Hydrogen flow rate    | 100 mL/min |

### 3. Some Experimental Data

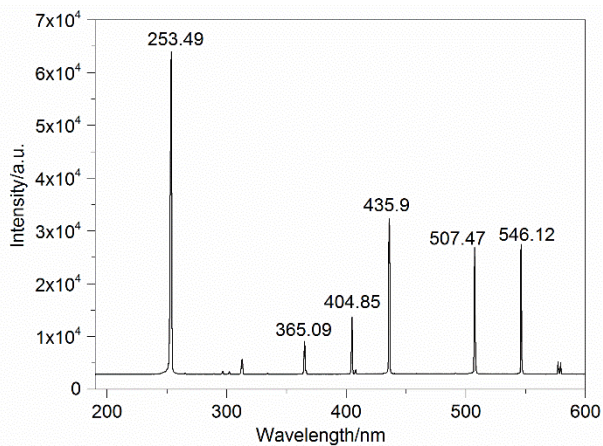

**Fig. S1** The UV lamp emission spectra

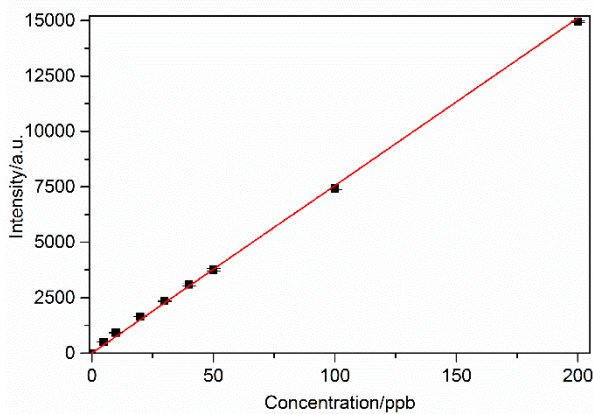

**Fig. S2** Calibration curve: AFS intensities versus Se(VI) concentrations.  $r^2$ : 0.993, and LOD ( $3\sigma$ ): 0.04 ppb

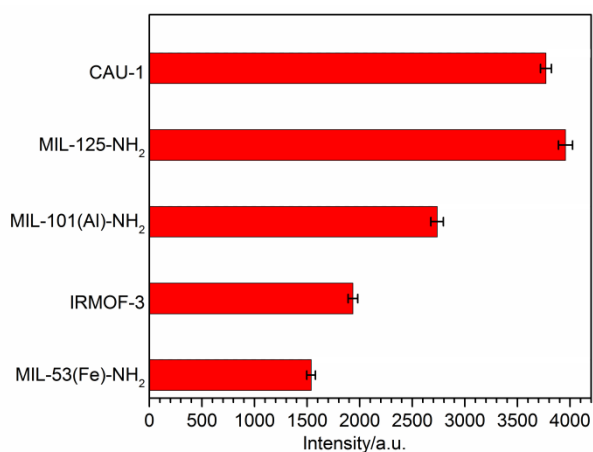

**Fig. S3** AFS intensity obtained from various MOFs as a photocatalyst (50 mg) for the PCVG (using 10% of HCOOH, v/v) of Se(VI) (50 ppb).

## 4. Synthesis and Characterization

CAU-1:

232 mg of  $\text{AlCl}_3 \cdot 6\text{H}_2\text{O}$  and 58 mg of  $\text{BDC-NH}_2$  were dissolved in 3.2 mL of methanol, and then stirred for 10 min and transferred into the microwave reactor, with the temperature risen up to 145 °C in 1 min and held for 2 mins. The whole suspension was then cooled down to room temperature. The obtained light yellow crystals were washed with ethanol and then dried at 120 °C in vacuum.

MIL-125- $\text{NH}_2$ :

0.6 mmol of tetrabutyl titanate and 1.2 mmol of  $\text{BDC-NH}_2$  were dissolved in mixture of 5 mL DMF and 5 mL methanol, stirring for 10 min and transferred into the microwave reactor, with the temperature risen up to 150 °C in 1 min and held for 1 hour. The whole suspension was then cooled down to room temperature. The obtained yellow crystals were washed with ethanol, dried at 120 °C in vacuum, and characterized with PXRD (Fig. S4).

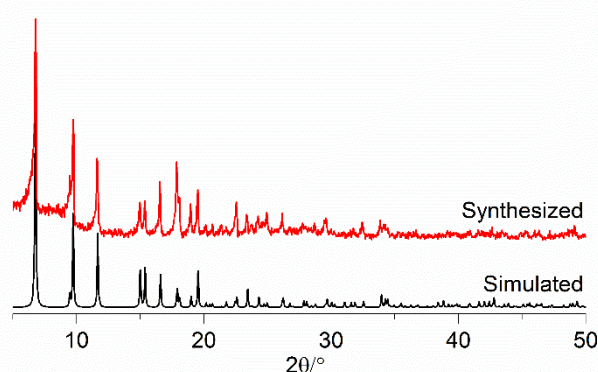

**Fig. S4** PXRD patterns of MIL-125- $\text{NH}_2$ .

MIL-101(Al)- $\text{NH}_2$ :

510 mg of  $\text{AlCl}_3 \cdot 6\text{H}_2\text{O}$  and 560 mg of  $\text{BDC-NH}_2$  were dissolved in 30 mL of DMF, stirred for 10 min and then transferred into the microwave reactor, with the temperature risen up to 130 °C in 1 min and held for 1 hour. The whole suspension was then cooled down to room temperature. The obtained light yellow crystals were washed with ethanol, dried at 120 °C in vacuum, and then characterized with PXRD (Fig. S5).

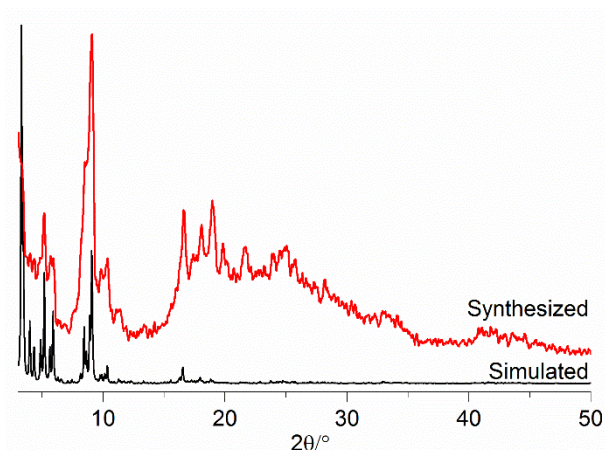

**Fig. S5** PXRD patterns of MIL-101(Al)-NH<sub>2</sub>

IRMOF-3:

170 mg of ZnCl<sub>2</sub>•6H<sub>2</sub>O and 51 mg of BDC-NH<sub>2</sub> were dissolved in 15 mL of DMF, stirred for 10 min. The obtained light yellow crystals were washed with ethanol, dried at 120 °C in vacuum, and then characterized with PXRD (Fig. S6).

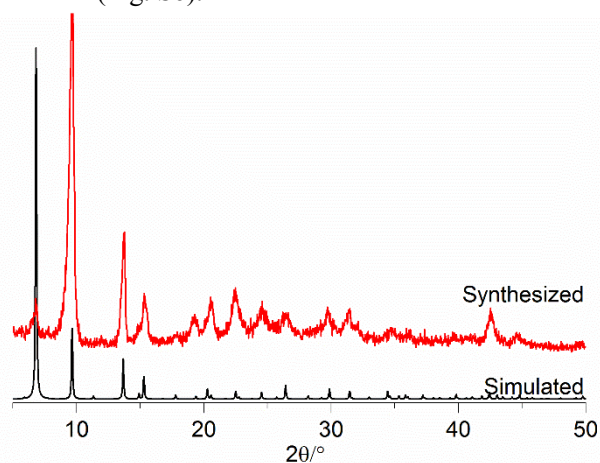

**Fig. S6** PXRD patterns of IRMOF-3

MIL-53(Fe)-NH<sub>2</sub>:

1.0812 g of FeCl<sub>3</sub>•6H<sub>2</sub>O and 0.3327 g of BDC were dissolved in 40 mL of DMF, stirred for 10 min and then transferred into the microwave reactor, with the temperature risen up to 100 °C in 1 min and held for 1 hour. The whole suspension was then cooled down to room temperature. The obtained red-brown crystals were washed with ethanol, dried at 120 °C in vacuum, and then characterized with PXRD (Fig. S7).

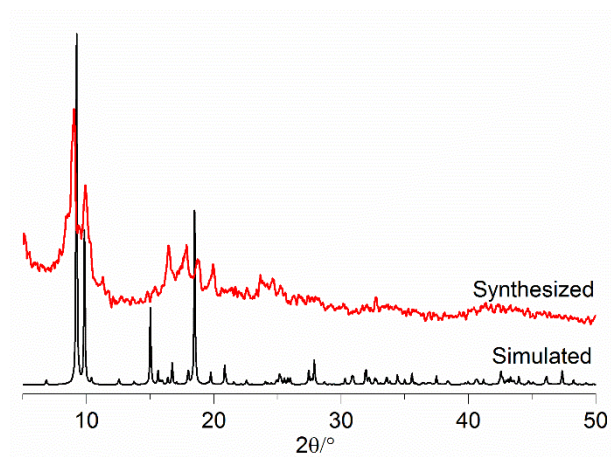

**Fig. S7** PXRD patterns of MIL-53(Fe)-NH<sub>2</sub>
